# Supplementary material
Source: PubMed Central journal article supplement (PMC3359951)
Supplement: supp_46.4.431_Raghavan_ODS.pdf [file supp_46.4.431_Raghavan_ODS.pdf]

**HYPOXIA INDUCED PULMONARY ARTERIAL SMOOTH MUSCLE CELL  
PROLIFERATION IS CONTROLLED BY FOXM1**

Aarti Raghavan, Guofei Zhou, Qiyuan Zhou, Joyce Christina F. Ibe, Ramaswamy Ramchandran, Qiwei Yang, Harini Racherla, Pradip Raychaudhuri, J. Usha Raj

**Online Data Supplement**

## **Materials and methods:**

### **Western Blot Analysis**

Equal amounts of protein were loaded onto 10% SDS-PAGE gels, which were transferred to a nitrocellulose membrane. Membranes were blocked with 7.5% non-fat milk and incubated in primary antibody overnight at 4 °C. Membranes were washed and incubated in secondary antibody and developed using SuperSignal West Pico Chemiluminescent Substrate (Pierce, Rockford, IL, USA). Protein band density was quantified using NIH Image J software. Tubulin was used as loading control.

### **qRT-PCR Primer sequences used:**

FoxM1, GGAGGAAATGCCACACTTAGCG (sense), TAGGACTTCTTGGGTCTTGGGGTG (antisense); HIF-1 $\alpha$ , TGAACATAAAGTCTGCAACATGGA (sense), TGAGGTTGGTTACTGTTGGTATCATATA (antisense); HIF-2 $\alpha$ , TGCTCCCACGGCCTGTAC (sense), TTGTCACACCTATGGCATATCACA (antisense); Aurora A kinase, AATCTGGAGGCAAGGTTCTGA (sense), CTGGATTTGCCTCCTGTGAAG (antisense); ribosomal protein L 19 (RPL19), ATCATCCGCAAGCCTGTG (sense), TGACCTTCTCTGGCATTCTG (antisense); Cyclin D1 (Qiagen, Valencia, CA, USA).
